# Supplementary material for: π-Hole spodium bonding in tri-coordinated Hg(ii) complexes
Source: Royal Society of Chemistry journal article supplement (doi:10.1039/d1dt01235e), 2021-01-01
Supplement: d1dt01235e1.pdf [file d1dt01235e1.pdf]

## Electronic Supplementary File for manuscript: $\pi$ -hole spodium bonding in tri-coordinated Hg(II) complexes

Rosa M. Gomila,<sup>a</sup> Antonio Bauza,<sup>b</sup> Tiddo J. Mooibroek<sup>\*,c</sup> and Antonio Frontera<sup>\*,b</sup>

### Table of contents:

|                     |        |
|---------------------|--------|
| Theoretical methods | Page 2 |
| Table S1            | Page 2 |
| Figure S1           | Page 4 |
| References          | Page 5 |

### Theoretical methods

The calculations were performed using Gaussian-16 program<sup>1</sup> at the PBE0-D3/def2-TZVP level of theory using the X-ray coordinates. The Grimme's D3 dispersion correction has been used in the calculations.<sup>2</sup> The molecular electrostatic potential surfaces have been computed at the same level of theory. This level of theory has been successfully used before to investigate SpB interactions.<sup>3</sup> The QTAIM analysis<sup>4</sup> and NCIPLOT index<sup>5</sup> calculations have been computed at the same level of theory by means of the AIMAll program.<sup>6</sup>

Table S1. CSD reference codes of HgXPn<sub>2</sub>, HgXCh<sub>2</sub>; HgXHa<sub>2</sub> X-ray structures

| <b>HgXPn<sub>2</sub>; total number of hits: 66</b>  |          |          |          |          |
|-----------------------------------------------------|----------|----------|----------|----------|
| BEFLIH                                              | BZAMHG   | BZPYHG   | CAZTII   | ECURUR   |
| EFUDOY                                              | ENTIHG   | FINFIR   | FOLLAT   | GEQREZ   |
| GIHYOL                                              | HASTOK   | HESMAT   | HOSCOH   | HOXBUR   |
| HOXCAY                                              | HOXCEC   | IFUHEW   | IRIZIU   | IRIZOA   |
| IZIDUQ                                              | JEJGOU   | JUWNOE   | KAZYEP   | KIHWIH   |
| KIKBIP                                              | KOLCOE   | LEGKUD   | LEGPOD   | LUWCEM   |
| LUWCIQ                                              | LUWCUC   | MBPYHG10 | MEPHGC10 | MNAZHG   |
| MPYHGA                                              | MPYHGA10 | NAPRHG   | ODUPIN   | PAVTAH   |
| PHNAHG                                              | PIXVAU   | QOTLOA   | QUKDUW   | ROBYEN   |
| SEGSEE                                              | SEQMIL   | SEQMOR   | SEQMUX   | SEQNIM   |
| SIRDEC                                              | SUTTEG   | TAWYEV   | TITBUT   | TUSVAG   |
| TUTLAX                                              | TUTLEB   | TUTLIF   | UJIKON   | VOCVEO   |
| WOLYEB                                              | XETXUQ   | XULREC   | YIZPIH   | ZAXXUT   |
| ZOWROS                                              |          |          |          |          |
| <b>HgXCh<sub>2</sub>; total number of hits: 147</b> |          |          |          |          |
| ABOGAZ                                              | ACHGPT   | ACHGPT10 | AJAJAX   | AROVOT   |
| BEMNOY                                              | BOBZUO   | BOCBAX   | BOCBEB   | BOMVAA   |
| CECSIN                                              | CHMEHG   | CUBVEB   | DEFBEV   | DELFIJ   |
| DIBWOA                                              | DOJFUE   | DOLFAM   | DPSEHG   | DPSEHG01 |
| DUFQOK                                              | DUVLUC   | EBUSUR   | EDIDEB   | EDUCUB   |
| EDUDAI                                              | EDUDEM   | EGIDOQ   | EGIDUW   | EKIYON   |
| EKIYUT                                              | EYAYUY   | FAKCOL   | FAKHOR   | FETTUT   |
| FINJOD                                              | FODRUN   | GEJTOF   | GERLOG   | GERLUM   |
| GEZPEG                                              | GOKPIG   | GUVQUJ   | HGCSUR01 | HUBRON   |
| HUTZIF                                              | IMUFUR   | IMUGAY   | ITASUR   | JANZOQ   |
| JEFVIZ                                              | JUWFOV   | KAHKAI   | KELVUS   | KEXZOC   |
| KEYMOQ                                              | KINZAI   | KIQSAE   | KIVVAM   | KIVVIU   |
| KUKQUE                                              | KUKSAM   | LAJCIJ   | LAJGOV   | LATTEF   |
| LECDED                                              | LOLYAM   | LOLYEQ   | LULVIX   | MEDTHG   |
| MIKKAT                                              | MIYPUG   | MTACHG   | NASLID   | NEGREZ   |
| NEGRID                                              | NEJGIV   | NOPTUI   | NOPVIX   | NOPVOD   |
| NOSSIX                                              | NOSSUJ   | NOYNIY   | PAFXOJ   | PETFUP   |
| PETFUP10                                            | POCFAP   | POTJAK   | PTEHGP   | QABJEI   |
| QEHDIQ                                              | QITKIQ   | QOHZAO   | RACJOW   | RASGIC   |
| RICLUK                                              | SANQAZ   | TASZOD   | TECKAN   | TECKIV   |
| TOBLIF                                              | TPARHG10 | TUJFUZ   | TUJFUZ01 | TUJFUZ02 |
| UCEYAD                                              | UDANAO   | UDEDUF   | UPITII   | UPITOE   |
| UPITUK                                              | UPIVAS   | VANFAT   | VIMBEA   | VIYKUK   |
| VIYLAR                                              | VIYLIZ   | VIYLOF   | VOXTOR   | VUKLOD   |
| WAPFOK                                              | WEJCUM   | WEWREY   | XAKHOG   | XOBQAI   |

|                                                     |          |          |          |          |
|-----------------------------------------------------|----------|----------|----------|----------|
| XOLGOW                                              | XUHROI   | XUHROI01 | YARNIP   | YAXHEN   |
| YAXHIR                                              | YEYUUX   | YEYZEI   | YOLHUD   | YOLJAL   |
| YOLJEP                                              | YOMXIJ   | YOMXOP   | YOMXUV   | YOMYAC   |
| ZESCUV                                              | ZESDAC   | ZETKAK   | ZIWDUG   | ZUHZOT   |
| ZUHZUZ                                              | ZURXEP   |          |          |          |
| <b>HgXHa<sub>2</sub>; total number of hits: 181</b> |          |          |          |          |
| AFEYOZ                                              | AXAWON   | BABLOH   | BABNAU   | BARGUW   |
| BEHLUV                                              | BETPEV   | BHGIRP   | BIMJAI   | BITHIV   |
| BOLLET                                              | BOPXIN02 | BORYIC02 | BORYIC03 | BSHGCL   |
| BUKYEN                                              | BUKYIR   | CAGPIK   | CEKHOR   | CEKJEJ   |
| CEKJIN                                              | CHGIRP   | CIBDUN   | CIDLIM   | CIDZUL   |
| CINZEF                                              | CMSMOM   | COZMAF   | COZMAF10 | CPCOHG10 |
| CPRUHG                                              | CUFCEL   | CUFCEL10 | CUPXUH   | DEBWAJ   |
| DEFYET                                              | DEJZIB   | DILTOH   | DOBCAZ   | DOBCIH   |
| DOTLIH                                              | DTIZHG01 | DTIZHG10 | DUGCEN   | DUSFAA   |
| ELEWEY                                              | EMIFOX   | EMINOF   | EMINUL   | EMSCHG   |
| ENTIHG                                              | EWOREN   | EXERII   | FEGLAE   | FIJQOF   |
| FOCLOY                                              | GARSEX   | GIRPUU   | GIRQAB   | GOCTUQ   |
| GOGHUH                                              | GUBBEK   | HARRAV   | HGCBPO10 | HGCETS   |
| HGCQIN                                              | HIRTUX   | HOTCEA   | IBAFEY   | IBAFIC   |
| ICACUN                                              | IRUVEW   | JANFEK   | JOGJOE   | KEZBAT   |
| KIQKED                                              | KOFXAE   | KOZREY   | KOZREY01 | KUKNAF   |
| LAQGIT                                              | LEHGAI   | LEQRAB   | LEQRUV   | LITSEM   |
| LOMPAG                                              | LOWJUE   | MAJHAI   | MAJHEM   | MHPCHG   |
| MIXQIW                                              | MOLVUE   | MOWFUA   | MOWGAH   | MUMDAB   |
| NEHQUM01                                            | NOFJIE   | NOSSUJ   | OXTETH10 | PASCHI   |
| PAYCAT                                              | PERGOJ   | PEWVAO   | PIGRIH   | PURGIS   |
| QEMDUH                                              | QEMDUH01 | QEVHUU   | QEZNUG   | QEZPAO   |
| QEZPIW                                              | QEZPOC   | QEZPUI   | QEZQAP   | QIJXIQ   |
| QIJXIQ01                                            | QOFQEH   | QOFQEH01 | QQQBVJ   | QQQBVJ02 |
| QQQBVJ03                                            | QQQBVJ04 | QQQBVJ31 | QQQBVJ32 | QQQBVJ33 |
| RAFJUD                                              | REGVUV   | RICSIG   | RIMKUW   | RITMAI   |
| RORREV                                              | RUYVUE   | SARBOC   | SEBNAP   | SIFCAL   |
| SIRMAH                                              | SODZES   | SOYPIF   | SURNOI   | TABYUS   |
| TAGCAF                                              | TEBPAS   | TEBPEW   | TMAHGB   | TMSCHG   |
| TMSHGI                                              | TMSHGI01 | TMSHGI02 | TOCJIH   | TOCJON   |
| UCEYIL                                              | UGUBOO   | UGUQES   | UJEROQ   | UJEROQ01 |
| UYOCES                                              | UYUSUD   | VEGSAD   | VEQJAE   | VEWKOY   |
| VICFIW                                              | VOFROX   | VOZGEW   | VUDSUJ   | VUJYUV   |
| VUPWUZ                                              | WABCEH   | WIVTAY   | WURPIJ   | WURPOP   |
| XIVKIW                                              | XIVKOC   | XOGKIN   | XUVRIQ   | YARNEL   |
| YAWNUF                                              | ZUPCUI   | ZZZDWQ   | ZZZHBA   | ZZZTLW   |
| ZZZTOE                                              |          |          |          |          |

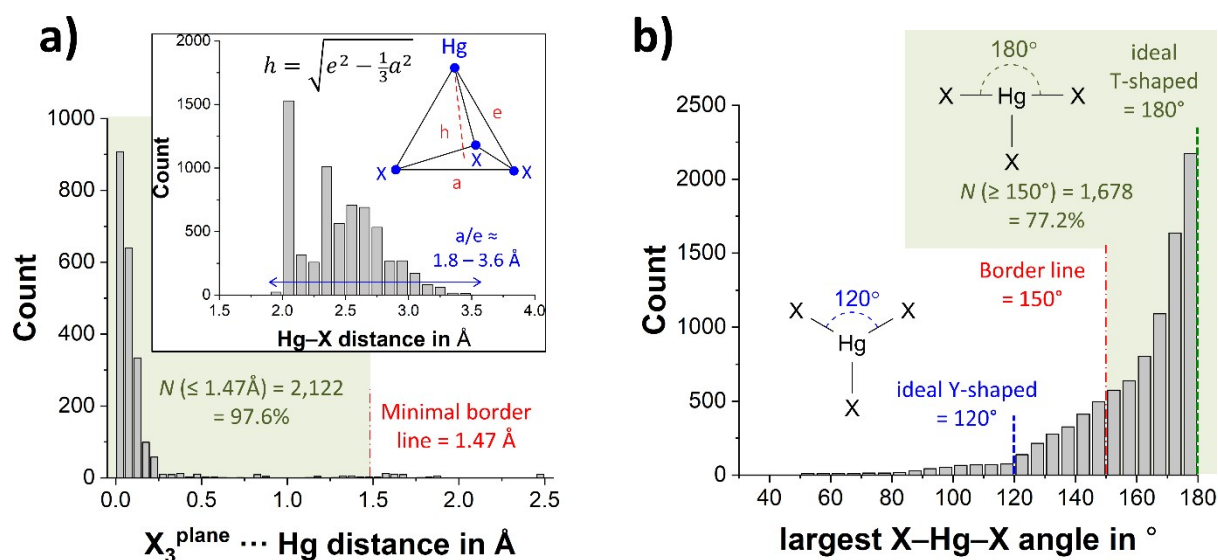

**Figure S1.** Plots to assess the geometry of  $\text{HgX}_3$  structures in the CSD. (a): Plot of the hit-count as a function of the  $\text{X}_3^{\text{plane}} \cdots \text{Hg}$  distance to assess the planarity of  $\text{HgX}_3$  structures. The plot shows that nearly all structures (97.6%, green) are best considered as planar, as opposed to a triangular pyramidal structure. The inset figure shows the relationship between the height of a triangular pyramid ( $h$ ) and length of the edges ( $a$  and  $e$ ), together with the actual distribution of  $\text{Hg-X}$  distances. Assuming that  $a = e = \text{Hg-X}$ , these give a height in between 1.47 and 2.94 Å. The lower value of 1.47 Å is used as borderline between a planar and triangular pyramidal structure (indicted in red). (b): Plot of the hit-count as a function of largest  $\text{X-Hg-X}$  to assess the proportion of structures with Y-shaped ( $\angle = 120^\circ$  in the ideal case) or a T-shaped ( $\angle = 180^\circ$  in the ideal case) geometry. The border between the two structures of  $150^\circ$  ( $(120+180)/2$ ) is marked with the red dash-dot line.

## References

1. M. J. Frisch, G. W. Trucks, H. B. Schlegel, G. E. Scuseria, M. A. Robb, J. R. Cheeseman, G. Scalmani, V. Barone, G. A. Petersson, H. Nakatsuji, X. Li, M. Caricato, A. Marenich, J. Bloino, B. G. Janesko, R. Gomperts, B. Mennucci, H. P. Hratchian, J. V. Ortiz, A. F. Izmaylov, J. L. Sonnenberg, D. Williams-Young, F. Ding, F. Lipparini, F. Egidi, J. Goings, B. Peng, A. Petrone, T. Henderson, D. Ranasinghe, V. G. Zakrzewski, J. Gao, N. Rega, G. Zheng, W. Liang, M. Hada, M. Ehara, K. Toyota, R. Fukuda, J. Hasegawa, M. Ishida, T. Nakajima, Y. Honda, O. Kitao, H. Nakai, T. Vreven, K. Throssell, J. A. Montgomery, Jr., J. E. Peralta, F. Ogliaro, M. Bearpark, J. J. Heyd, E. Brothers, K. N. Kudin, V. N. Staroverov, T. Keith, R. Kobayashi, J. Normand, K. Raghavachari, A. Rendell, J. C. Burant, S. S. Iyengar, J. Tomasi, M. Cossi, J. M. Millam, M. Klene, C. Adamo, R. Cammi, J. W. Ochterski, R. L. Martin, K. Morokuma, O. Farkas, J. B. Foresman, D. J. Fox, Gaussian 16 (Revision A.03), Gaussian Inc., Wallingford CT, 2016.
2. S. Grimme, J. Antony, S. Ehrlich and H. Krieg, *J. Chem. Phys.*, 2010, **132**, 154104.
3. (a) M. Karmakar, A. Frontera, S. Chattopadhyay, T. J. Mooibroek and A. Bauzá, *Int. J. Mol. Sci.*, 2020, **21**, 7091; (b) G. Mahmoudi, S. E. Lawrence, J. Cisterna, A. Cárdenas, I. Brito, A. Frontera and D. A. Safin, *New J. Chem.*, 2020, **44**, 21100-21107
4. R. F. W. Bader, *Chem. Rev.*, 1991, **91**, 893-928
5. J. Contreras-Garcia, E. Johnson, S. Keinan, R. Chaudret, J.-P. Piquemal, D. Beratan and W. Yang, *J. Chem. Theor. Comp.*, 2011, **7**, 625-632.
6. T. A. Keith, AIMAll (Version 19.02.13), TK Gristmill Software, Overland Park KS, USA, 2019 (aim.tkgristmill.com).
